# Supplementary material for: Data Management and Sharing for Collaborative Science: Lessons Learnt From the Euromammals Initiative
Source: Frontiers journal article supplement (doi:10.3389/fevo.2021.727023), 2021-09-10
Supplement: Table_1.pdf [file Table_1.pdf]

## *Supplementary Material*

**Supplementary Table 1.** List of Euromammals partners as of June 2021. ID indicates the labels in the map in Figure 1.

| <b>ID</b> | <b>Euromammals partner</b>                                                                                                          | <b>Country</b> | <b>Year Joined</b> |
|-----------|-------------------------------------------------------------------------------------------------------------------------------------|----------------|--------------------|
| 1         | Edmund Mach Foundation (FEM), Research and Innovation Centre                                                                        | Italy          | 2008               |
| 2         | Bavarian Forest National Park                                                                                                       | Germany        | 2008               |
| 3         | National Centre for Scientific Research (CNRS), Centre for Biological Studies of Chizé (CEBC)                                       | France         | 2008               |
| 4         | Leibniz-Institute for Zoo and Wildlife Research (IZW), Berlin                                                                       | Germany        | 2008               |
| 5         | Swedish University of Agricultural Sciences (SLU), Department of Ecology, Grimsö Wildlife Research Station                          | Sweden         | 2008               |
| 6         | Research Institute for Wildlife and Forest (INBO)                                                                                   | Belgium        | 2009               |
| 7         | Sumava National Park                                                                                                                | Czech Republic | 2009               |
| 8         | National Research Institute for Agriculture, Food and the Environment (INRAE), Wildlife, Behaviour and Ecology Research Unit (CEFS) | France         | 2009               |
| 9         | University of Siena, Department of Life Sciences                                                                                    | Italy          | 2009               |
| 10        | University of Padua, DAFNAE Department                                                                                              | Italy          | 2009               |
| 11        | Institute for Environmental Protection and Research - ISPRA                                                                         | Italy          | 2009               |
| 12        | Research, Ecology and Environment Dimension (D.R.E.Am. Italia)                                                                      | Italy          | 2009               |
| 13        | University of Oslo, Department of Biology                                                                                           | Norway         | 2009               |
| 14        | Norwegian Institute for Nature Research (NINA)                                                                                      | Norway         | 2009               |
| 15        | Department of Biology & CESAM, University of Aveiro                                                                                 | Portugal       | 2009               |
| 16        | Environmental Protection College (EPC)                                                                                              | Slovenia       | 2009               |

## Supplementary Material

|    |                                                                                                                |                |      |
|----|----------------------------------------------------------------------------------------------------------------|----------------|------|
| 17 | University of Zurich, Institute of Evolutionary Biology and Environmental Studies                              | Switzerland    | 2010 |
| 18 | University of Natural Resources and Life Sciences (Boku)                                                       | Austria        | 2011 |
| 19 | Forest Research Institute Baden-Wuerttemberg (FVA)                                                             | Germany        | 2011 |
| 20 | Mammal Research Institute Bialowieza (MRI)                                                                     | Poland         | 2011 |
| 21 | Claude Bernard Lyon 1 University, Laboratory of Biometry and Evolutionary Biology                              | France         | 2012 |
| 22 | French Office for Biodiversity (OFB), Research and Scientific Support Department (DRAS)                        | France         | 2012 |
| 23 | National Research Council (CNR), Institute for Complex Systems (ISC)                                           | Italy          | 2012 |
| 24 | Aarhus University, Department of Bioscience, Wildlife Ecology and Biodiversity                                 | Denmark        | 2013 |
| 25 | Stelvio Stilfserjoch National Park (PNS)                                                                       | Italy          | 2013 |
| 26 | Zurich University of Applied Sciences (ZHAW), Wildlife Management (WILMA)                                      | Switzerland    | 2013 |
| 27 | University of Applied Sciences of West Switzerland (HES-SO)                                                    | Switzerland    | 2013 |
| 28 | Swansea University, Department of Biosciences                                                                  | United Kingdom | 2013 |
| 29 | Institute for Wildlife Biology of Göttingen and Dresden (IWDG)                                                 | Germany        | 2014 |
| 30 | Swedish University of Agricultural Sciences (SLU), Umea Center for Wireless Remote Animal Monitoring (UC-WRAM) | Sweden         | 2014 |
| 31 | Department of Study of the Natural and Agricultural Environment (DEMNA)                                        | Belgium        | 2015 |
| 32 | University of Zagreb, Faculty of Agriculture                                                                   | Croatia        | 2015 |
| 33 | Czech University of life sciences, Department of Game Management and Wildlife Biology                          | Czech Republic | 2015 |
| 34 | University of Veterinary Medicine Hannover, Institute for Wildlife Research                                    | Germany        | 2015 |
| 35 | University of Sopron, Institute of Wildlife Management and Wildlife Biology                                    | Hungary        | 2015 |
| 36 | Ganei Ramat Hanadiv                                                                                            | Israel         | 2015 |

|    |                                                                                                                      |                 |      |
|----|----------------------------------------------------------------------------------------------------------------------|-----------------|------|
| 37 | Regione Lazio, Area Biodiversita e Geodiversita                                                                      | Italy           | 2015 |
| 38 | Institute of Plant and Animal Ecology, Ural Branch of Russian Academy of Sciences                                    | Russia          | 2015 |
| 39 | University of Belgrade, Faculty of Forestry                                                                          | Serbia          | 2015 |
| 40 | University of Ljubljana, Biotechnical Faculty, Department for forestry                                               | Slovenia        | 2015 |
| 41 | MINUARTIA                                                                                                            | Spain           | 2015 |
| 42 | Svensk Naturförvaltning AB                                                                                           | Sweden          | 2015 |
| 43 | Institute of Forestry, Department of Forest Protection and Game Management (LAMMC)                                   | Lithuania       | 2016 |
| 44 | Nature and Forest Agency (ANF)                                                                                       | Luxembourg      | 2016 |
| 45 | Slovenian Forestry Institute (SFI)                                                                                   | Slovenia        | 2016 |
| 46 | Bulgarian Academy of Science, Institute of Biodiversity and Ecosystem Research                                       | Bulgaria        | 2017 |
| 47 | Czech Academy of Sciences, Global Change Research Institute                                                          | Czech Republic  | 2017 |
| 48 | University College Dublin, School of Biology and Environmental Science, Laboratory of Wildlife Ecology and Behaviour | Ireland         | 2017 |
| 49 | Institute of Nature Conservation, Polish Academy of Sciences (PAS)                                                   | Poland          | 2017 |
| 50 | University of Barcelona, Wildlife Diseases Research Group (SEFaS)                                                    | Spain           | 2017 |
| 51 | Independent, Bosch Jaime                                                                                             | Spain           | 2017 |
| 52 | Serra de Collserola National Park                                                                                    | Spain           | 2017 |
| 53 | Wageningen University, Department of Environmental Sciences                                                          | The Netherlands | 2017 |
| 54 | University of Zagreb, Faculty of Veterinary Medicine                                                                 | Croatia         | 2018 |
| 55 | Mendel University Brno, Department of Forest Ecology                                                                 | Czech Republic  | 2018 |
| 56 | Czech Academy of Sciences, Institute of Vertebrate Biology                                                           | Czech Republic  | 2018 |
| 57 | University of Tartu                                                                                                  | Estonia         | 2018 |

## Supplementary Material

|    |                                                                                         |                 |      |
|----|-----------------------------------------------------------------------------------------|-----------------|------|
| 58 | Estonian Environmental Agency                                                           | Estonia         | 2018 |
| 59 | La Société Française pour l'Etude et la Protection des Mammifères                       | France          | 2018 |
| 60 | Fédération Départementale des chasseurs du Jura                                         | France          | 2018 |
| 61 | Centre de Recherche et d'Observation sur les Carnivores (CROC)                          | France          | 2018 |
| 62 | Centre d'Ecologie Fonctionnelle et Evolutive (CEFE)                                     | France          | 2018 |
| 63 | Bavarian State Institute of Forestry                                                    | Germany         | 2018 |
| 64 | Independent, Handschuh Markus                                                           | Germany         | 2018 |
| 65 | Hainich National Park                                                                   | Germany         | 2018 |
| 66 | Research Institute for Forest Ecology and Forestry                                      | Germany         | 2018 |
| 67 | BUND e.V. Friends of the Earth Germany, Landesverband Thüringen                         | Germany         | 2018 |
| 68 | Wildlife Ecological and Osteological Consultancy                                        | Ireland         | 2018 |
| 69 | University of Sassari, Department of Veterinary Medicine                                | Italy           | 2018 |
| 70 | Latvian State Forest Research Institute (SILAVA)                                        | Latvia          | 2018 |
| 71 | Macedonian Ecological Society (MES)                                                     | Macedonia       | 2018 |
| 72 | Department of Biology & CESAM, University of Aveiro<br>Portugal                         |                 | 2018 |
| 73 | Association for the Conservation of Biological Diversity                                | Romania         | 2018 |
| 74 | University of Novi Sad                                                                  | Serbia          | 2018 |
| 75 | Slovenia Forest Service                                                                 | Slovenia        | 2018 |
| 76 | University of Castilla-La Mancha, Research Institute of Hunting Resources (IREC)        | Spain           | 2018 |
| 77 | University of Amsterdam (UvA), Institute for Biodiversity and Ecosystem Dynamics (IBED) | The Netherlands | 2018 |
| 78 | Duzce University, Faculty of Forestry, Wildlife Ecology and Management                  | Turkey          | 2018 |

|    |                                                                                                                                                     |                |      |
|----|-----------------------------------------------------------------------------------------------------------------------------------------------------|----------------|------|
| 79 | Animal and Plant Health Agency (APHA)                                                                                                               | United Kingdom | 2018 |
| 80 | National Park Thayatal (NPT), Administration                                                                                                        | Austria        | 2019 |
| 81 | National Park Thayatal (NPT), Platform Wildcat                                                                                                      | Austria        | 2019 |
| 82 | National Academy of Sciences of Belarus on Bioresources, Laboratory of Population Ecology of Terrestrial Vertebrates and Management of Bioresources | Belarus        | 2019 |
| 83 | Mendel University Brno, Department of Zoology, Fisheries, Hydrobiology and Apiculture                                                               | Czech Republic | 2019 |
| 84 | Observatoire des Carnivores Sauvages (OCS)                                                                                                          | France         | 2019 |
| 85 | University of Goettingen, Wildlife Sciences                                                                                                         | Germany        | 2019 |
| 86 | Technical University Dresden, Chair of Forest Zoology, AG Wildlife Research                                                                         | Germany        | 2019 |
| 87 | OEKO-LOG Field research                                                                                                                             | Germany        | 2019 |
| 88 | Institute of Animal Ecology and Nature Education (ITN)                                                                                              | Germany        | 2019 |
| 89 | Animal Ecology and Nature Education                                                                                                                 | Germany        | 2019 |
| 90 | Independent, Manfred Trinzen                                                                                                                        | Germany        | 2019 |
| 91 | Harz National Park                                                                                                                                  | Germany        | 2019 |
| 92 | German Wildlife Foundation                                                                                                                          | Germany        | 2019 |
| 93 | Aristotle University of Thessaloniki, School of Biology, Department of Zoology, Laboratory of Marine and Terrestrial Animal Diversity               | Greece         | 2019 |
| 94 | Aristotle University of Thessaloniki, School of Biology, Department of Zoology, Laboratory of Zoology                                               | Greece         | 2019 |
| 95 | Kaposvar University, Carnivore Ecology Research Group                                                                                               | Hungary        | 2019 |
| 96 | University of Turin (UniTO), Department of Life Sciences and Systems Biology                                                                        | Italy          | 2019 |
| 97 | University of Molise (UniMOL), Department of Biosciences and Territory                                                                              | Italy          | 2019 |
| 98 | Ca Foscari University of Venice                                                                                                                     | Italy          | 2019 |
| 99 | University of Bologna, Department of Biological, Geological, and Environmental Sciences                                                             | Italy          | 2019 |

## Supplementary Material

|     |                                                                                                    |                |      |
|-----|----------------------------------------------------------------------------------------------------|----------------|------|
| 100 | Italian Lynx Project                                                                               | Italy          | 2019 |
| 101 | LUTRIA snc Wildlife Research and Consulting                                                        | Italy          | 2019 |
| 102 | National Research Council (CNR), Research Institute on Terrestrial Ecosystems (IRET)               | Italy          | 2019 |
| 103 | Independent, Stefano Anile                                                                         | Italy          | 2019 |
| 104 | Ethoikos Foundation                                                                                | Italy          | 2019 |
| 105 | Inland Norway University of Applied Sciences (INN), Department of Forestry and Wildlife Management | Norway         | 2019 |
| 106 | Jagiellonian University, Institute of Environmental Sciences                                       | Poland         | 2019 |
| 107 | Adam Mickiewicz University (UaM), Department of Systematic Zoology                                 | Poland         | 2019 |
| 108 | Forest Research Institute (IBL), Department of Forest Ecology                                      | Poland         | 2019 |
| 109 | University of Porto, Research Centre in Biodiversity and Genetic Resources, CIBIO/InBIO            | Portugal       | 2019 |
| 110 | National Zoo Bojnica                                                                               | Slovakia       | 2019 |
| 111 | Natural Science Museum of Granollers                                                               | Spain          | 2019 |
| 112 | Carnivore Ecology and Wildlife Management (KORA)                                                   | Switzerland    | 2019 |
| 113 | University of Edinburgh                                                                            | United Kingdom | 2019 |
| 114 | University of Bristol                                                                              | United Kingdom | 2019 |
| 115 | National Museums Scotland                                                                          | United Kingdom | 2019 |
| 116 | BioGeoMaps                                                                                         | Austria        | 2020 |
| 117 | The University of British Columbia, Working on Restoring Connectivity and Sustainability Lab       | Canada         | 2020 |
| 118 | Olomouc Friends of the Earth                                                                       | Czech Republic | 2020 |
| 119 | University of Goettingen, Workgroup Endangered Species Conservation                                | Germany        | 2020 |

|     |                                                                                                              |                |      |
|-----|--------------------------------------------------------------------------------------------------------------|----------------|------|
| 120 | University of Giessen, Clinic for Birds, Reptiles, Amphibians and Fish, Working Group for Wildlife Research  | Germany        | 2020 |
| 121 | Retscheider Hof e.V.                                                                                         | Germany        | 2020 |
| 122 | Wildlife Research Unit, Agricultural Centre Baden-Württemberg                                                | Germany        | 2020 |
| 123 | JagdEinrichtungsbuero (JEB)                                                                                  | Germany        | 2020 |
| 124 | Stadtforstamt Rostock                                                                                        | Germany        | 2020 |
| 125 | BUND e.V. Friends of the Earth Germany, Landesverband Berlin                                                 | Germany        | 2020 |
| 126 | Szent István University, Institute for Natural Resources Conservation, Department of Wildlife Biology        | Hungary        | 2020 |
| 127 | Orseg National Park                                                                                          | Hungary        | 2020 |
| 128 | University College Dublin, School of Mathematics and Statistics                                              | Ireland        | 2020 |
| 129 | Gran Paradiso National Park                                                                                  | Italy          | 2020 |
| 130 | Maremma Natural History Museum                                                                               | Italy          | 2020 |
| 131 | University of Warsaw, Faculty of Biology, Institute of Functional Biology and Ecology, Department of Ecology | Poland         | 2020 |
| 132 | Environmental Protection Agency (Vrancea)                                                                    | Romania        | 2020 |
| 133 | Foundation Conservation Carpathia                                                                            | Romania        | 2020 |
| 134 | University of Oviedo                                                                                         | Spain          | 2020 |
| 135 | Wildtier Schweiz                                                                                             | Switzerland    | 2020 |
| 136 | Swiss National Park                                                                                          | Switzerland    | 2020 |
| 137 | Kastamonu University, Game and Wildlife                                                                      | Turkey         | 2020 |
| 138 | Kuzey Doga Society                                                                                           | Turkey         | 2020 |
| 139 | Vincent Wildlife Trust                                                                                       | United Kingdom | 2020 |
| 140 | European Wilderness Society                                                                                  | Austria        | 2021 |
| 141 | Bulgarian Food Safety Agency                                                                                 | Bulgaria       | 2021 |
| 142 | The University of British Columbia - Institute for Resources, Environment and Sustainability                 | Canada         | 2021 |

## Supplementary Material

|     |                                                                                                                       |                |      |
|-----|-----------------------------------------------------------------------------------------------------------------------|----------------|------|
| 143 | National Research Institute for Agriculture, Food and the Environment (INRAE), Forest Ecosystems Research Unit (EFNO) | France         | 2021 |
| 144 | Der Gruene Zoo Wuppertal                                                                                              | Germany        | 2021 |
| 145 | Max Planck Institute of Animal Behavior                                                                               | Germany        | 2021 |
| 146 | Independent, Malte Goetz, BRUMBACHWILD                                                                                | Germany        | 2021 |
| 147 | Institute of Forest Ecology and Forestry                                                                              | Germany        | 2021 |
| 148 | MammalNet Hungary                                                                                                     | Hungary        | 2021 |
| 149 | University of Florence - Dipartimento di Biologia                                                                     | Italy          | 2021 |
| 150 | MUSE – Museo delle Scienze                                                                                            | Italy          | 2021 |
| 151 | Gruppo Ricerca Naturalistica (GRN) Fuorisentiero                                                                      | Italy          | 2021 |
| 152 | Jagiellonian University, Institute of Environmental Sciences - Camera Trapping                                        | Poland         | 2021 |
| 153 | Mammal Research Institute Bialowieza (MRI) - Camera Trapping                                                          | Poland         | 2021 |
| 154 | Gorce National Park                                                                                                   | Poland         | 2021 |
| 155 | Sapienta Hungarian University of Transylvania                                                                         | Romania        | 2021 |
| 156 | Institució Catalana d'Història Natural, Grup de Recerca de Carnívors de Catalunya (FELIS - ICHN)                      | Spain          | 2021 |
| 157 | Department of Wildlife fish and environmental sciences - Swedish University of Agricultural Sciences Umeå             | Sweden         | 2021 |
| 158 | North Carolina State University                                                                                       | USA            | 2021 |
| 159 | University of Exeter, Environment and Sustainability Institute, Wildlife Science Group                                | United Kingdom | 2021 |
| 160 | School of Natural Sciences Bangor University                                                                          | United Kingdom | 2021 |
| 161 | MammalWeb                                                                                                             | United Kingdom | 2021 |

---
